# Supplementary material for: A molecular mechanism for LINC complex branching by structurally diverse SUN-KASH 6:6 assemblies
Source: eLife. 2021 Jan 4;10:e60175. doi: 10.7554/eLife.60175 (PMC7800377; doi:10.7554/eLife.60175)
Supplement: Figure 4—source data 1. [file elife-60175-fig4-data1.xlsx]

## Sheet: Figure 4b SUN1-KASH4
Figure 4b	SUN1-KASH4
	Wild-type										I673E
	F671E										W676E

## Sheet: Figure 4b SUN1-KASH5
Figure 4b	SUN1-KASH5
	Wild-type										I673E
	F671E										W676E

## Sheet: Figure 4b SUN1-KASH1
Figure 4b	SUN1-KASH1
	Wild-type										I673E
	F671E										W676E
