# Supplementary material for: A molecular mechanism for LINC complex branching by structurally diverse SUN-KASH 6:6 assemblies
Source: eLife. 2021 Jan 4;10:e60175. doi: 10.7554/eLife.60175 (PMC7800377; doi:10.7554/eLife.60175)
Supplement: Figure 5—source data 1. [file elife-60175-fig5-data1.xlsx]

## Sheet: Figure 4b SUN1-KASH4
Figure 5a
	SUN1-KASH4										SUN1-KASH5
	SUN1-KASH1										SUN1-KASH1 C705A
	SUN1-KASH1 IE
